# Supplementary material for: A star-shaped cyclopentadithiophene-based dopant-free hole-transport material for high-performance perovskite solar cells
Source: Royal Society of Chemistry journal article supplement (doi:10.1039/d1cc02396a), 2021-01-01
Supplement: d1cc02396a1.pdf [file d1cc02396a1.pdf]

## Supporting Information

Star-shaped cyclopentadithiophene-based dopant-free hole-transporting material for high-performance perovskite solar cells

Kun-Mu Lee,<sup>a,b,c</sup> Jui-Yu Yang,<sup>d</sup> Ping-Sheng Lai,<sup>e</sup> Ke-Jyun Luo,<sup>d</sup> Ting Yu Yang,<sup>d</sup> Kang- Ling Liao,<sup>f</sup> Seid Yimer Abate,<sup>g</sup> and Yan-Duo Lin<sup>\*d</sup>

<sup>a</sup>Department of Chemical and Materials Engineering, Chang Gung University, Taoyuan 33302, Taiwan

<sup>b</sup>Division of Neonatology, Department of Pediatrics, Chang Gung Memorial Hospital, Linkou Taoyuan 33305, Taiwan

<sup>c</sup>Center for Green Technology, Chang Gung University, Taoyuan 33302, Taiwan

<sup>d</sup>Department of Chemistry, Soochow University, Taipei 11102, Taiwan

<sup>e</sup>Department of Applied Chemistry, National Chiayi University, Chiayi 60004, Taiwan

<sup>f</sup>Department of Chemistry, National Central University, Taoyuan 32001, Taiwan

<sup>g</sup>Institute of Chemistry, Academia Sinica, Taipei 115024, Taiwan

Email: ydlin@scu.edu.tw

## **Materials and Reagents**

All commercial solvents and chemicals were purchased from Aldrich, with the purity more than 98%. The Thin-layer chromatography (TLC) was conducted with Merck KGaA precoated TLC Silica gel 60F254 on aluminum sheets. Flash column chromatography was performed on glass columns packed with silica gel using Silicycle UltraPure SilicaFlash P60, 40–63 mm (230–400 mesh). Unless otherwise specified, all reactions and manipulations were carried out under a nitrogen atmosphere. Solvents of reagent grade were used for syntheses and those of spectroscopy grade for spectra measurements. Solvents were dried by standard procedures.

## **Characterization**

$^1\text{H}$  and  $^{13}\text{C}$  NMR spectra were recorded on a Bruker 400 and 500 MHz spectrometer. Matrix-assisted laser desorption ionization-time of flight (MALDI-TOF) mass spectra were recorded on a Jeol JMS 700 double-focusing spectrometer. UV spectra were measured on a Jasco V-530 double beam spectrophotometer. Fluorescence spectra were recorded on a Hitachi F-4500 fluorescence spectrophotometer. CV experiments were performed with a CHI-621A electrochemical analyzer. All measurements were carried out at room temperature with a conventional three-electrode configuration that consisted of a platinum working electrode, an auxiliary electrode, and a non-aqueous  $\text{Ag}/\text{AgNO}_3$  reference electrode. The SEM images were obtained by using a field-emission scanning electron microscope (JEOL-7401). A Nano-Scope NS3A system (Digital Instrument) was used to obtain the AFM images of the surface morphologies and thicknesses of various thin films.

## **Solar cell fabrication.**

A  $\text{TiO}_2$  compact layer (~30 nm in thickness) was deposited by spin-coating a titanium isopropyl solution onto a  $\text{F}:\text{SnO}_2$  (FTO) substrate. A 150 nm-thick mesoporous  $\text{TiO}_2$  film (particle size: ~ 20 nm,

crystalline phase: anatase) was spin-coated onto the compact-TiO<sub>2</sub>/FTO substrate using home-made pastes and heated at 500 °C for 30 min. After sintering the TiO<sub>2</sub> layer, the electrode was cooled to room temperature and immersed in 0.04 M aqueous TiCl<sub>4</sub> at 70 °C for 30 min. The film was then rinsed by deionized water and then annealed at 500 °C for 30 min again. After cooling to room temperature the substrate was transferred to a nitrogen-filled glove box. A solution consisting of PbI<sub>2</sub> (1.25 M) and methylammonium iodide (1.25 M) in  $\gamma$ -butyrolactone (GBL) and DMSO (7/3, v/v) was deposited onto the substrate by a two-step spin-coating process at 1000 and 5000 rpm for 10 and 20 s, respectively. During the second spin-coating step, the substrate was treated with 50  $\mu$ L toluene by drop-casting. The substrate was dried on a hot plate at 100 °C for 10 min. The **T-CPDT** and **C-CPDT** molecules studied in this work were dissolved in chlorobenzene (40 mg/mL) and spin-coated on the substrate at 2000 rpm for 30 s. The solution of spiro-OMeTAD was prepared in chlorobenzene (40 mg/mL) and mixed with 17.5  $\mu$ L stock solution of lithium bis-trifluoromethanesulfonimide (Li-TSFI, 520 mg in 1 mL acetonitrile) and 28.5  $\mu$ L 4-*tert*-butylpyridine. The solution was spin-coated on substrate at 2000 rpm for 30 s. Finally, the Ag counter electrode was deposited by thermal evaporation (~100 nm). The active area of this electrode was fixed at 0.16 cm<sup>2</sup>. *J-V* curves were recorded with a Keithley 2400 source meter under simulated AM 1.5G sunlight, calibrated to 100 mW/cm<sup>2</sup>. The reported device characteristics were estimated from the measured *J-V* curves.

### **Solar cell performance measurement**

Solar cell efficiencies were evaluated under simulated one sun irradiation from a Xe arc lamp with an AM 1.5 global filter. Irradiance was characterized using a calibrated spectrometer and illumination intensity was set using an NREL certified silicon diode with an integrated KG1 optical filter: spectral mismatch factors were calculated for each device in this report to be less than 5%.

IPCE spectra were measured in air using a commercial IPCE set-up (Enlitech, QE-R).

### **Mobility measurements**

In order to assess the potential of **T-CPDT**, **C-CPDT**, and spiro-OMeTAD as hole transport materials, hole-only devices were fabricated with the device structure ITO/PEDOT:PSS/HTM/Al. Hole mobilities were calculated by the space-charge-limited current (SCLC) method using the Mott-Gurney law, by fitting experimental data to equation (1) in the voltage range where the obtained slope in the double log plot is equal to 2.

$$J = \frac{9}{8} \epsilon_r \epsilon_0 \mu_h \frac{V^2}{d^3} \quad (1)$$

In equation (1),  $J$  is the current density,  $\epsilon_0$  is the permittivity of free space ( $8.85 \times 10^{-12} \text{ F m}^{-1}$ ),  $\epsilon_r$  is the relative permittivity of the material (approaching 3 for organic semiconductors),  $\mu_h$  is the hole mobility,  $V$  is the applied voltage and  $d$  is the thickness of the active layer.

The hole-only devices were fabricated by spin-coating PEDOT:PSS (Clevios P, VP Al4083) onto pre-cleaned, patterned indium tin oxide (ITO) substrates ( $15 \text{ } \Omega/\text{square}$ ) (Kintec). A film of the HTM was spin-coated on top from chloroform solution with a concentration of  $40 \text{ mg mL}^{-1}$ . The film thickness was varied by using different spin-coating speeds. As a counter electrode, Al was deposited on top by vacuum evaporation. The current density–voltage curves of the devices were recorded with a Keithley 2400 Source meter.

### **Computation method**

Computations were performed using the Gaussian 03 program package. The geometry was optimized by using B3LYP (Becke three parameters hybrid functional with Lee-Yang-Parr correlation functionals) with the Pople 6-31G(d,p) atomic basis set.<sup>S1</sup>

### **Scheme S1. Synthetic procedures for C-CPDT**

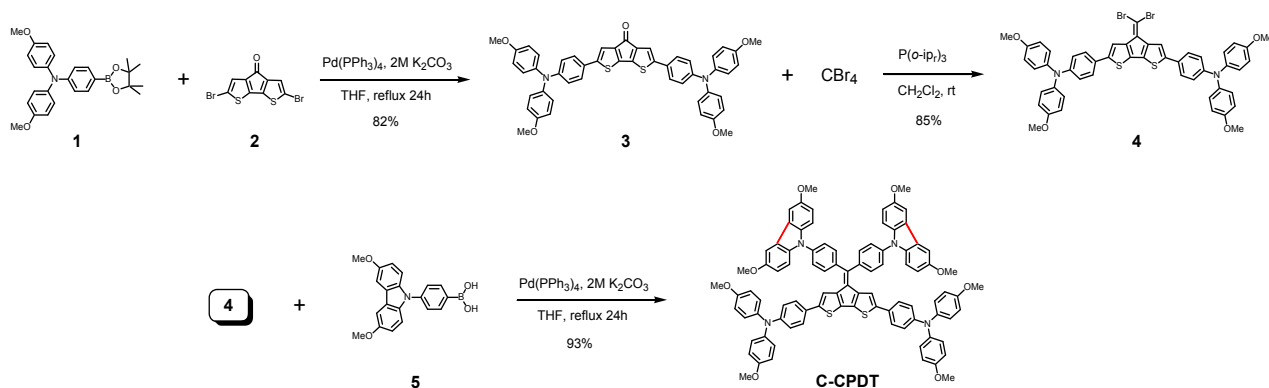

**Synthesis of 3.** A heterogeneous mixture of 2 M  $K_2CO_3$  (12 mL), THF (16 mL), **1** (2.07 g, 4.8 mmol), **2** (0.8 g, 2.3 mmol), and  $Pd(PPh_3)_4$  (0.106 g, 4 mol %) under argon was heated at 80 °C for 18 h. The mixture was extracted with  $CH_2Cl_2$ . The organic layer was separated and dried over anhydrous  $MgSO_4$ . Evaporation of the solvent gave a crude product, which was purified by silica gel column chromatography using  $CH_2Cl_2$ /hexane (1/1) as eluent to afford the desired product as a black solid in 82% yield. mp 132-134 °C;  $^1H$  NMR (400 MHz,  $CDCl_3$ ):  $\delta$  7.31 (d,  $J$  = 8.8 Hz, 4H), 7.08-7.04 (m, 10H), 6.89 (d,  $J$  = 8.8 Hz, 4H), 6.85 (d,  $J$  = 8.8 Hz, 8H), 3.80 (s, 12H) ppm;  $^{13}C$  NMR 100 MHz,  $CDCl_3$ ):  $\delta$  184.1, 156.4, 148.9, 147.7, 142.3, 140.6, 127.1, 126.1, 125.7, 120.3, 115.8, 115.0, 55.72 ppm.; HRMS (MALDI-TOF)  $m/z$  [ $M^+$ ] calcd for  $C_{49}H_{38}N_2O_5S_2$ : 798.2222; found: 798.2225.

**Synthesis of 4.** Compound **3** (0.4 g, 0.50 mmol),  $P(o-iPr)_3$  (0.19 g, 2.34 mmol), and  $CBr_4$  (0.2 g, 0.60 mmol) were dissolved in dry  $CH_2Cl_2$  (34 mL). The reaction mixture was stirred for 18 h at room temperature, thereafter, distilled water was added to quench the reaction. The organic layer was separated, washed with water, dried over anhydrous  $MgSO_4$ , filtered and evaporated under reduced pressure. The reaction crude was purified by flash chromatography (silica gel, hexane/dichloromethane 1:1), yielding a black solid in 85%. mp 148-150 °C;  $^1H$  NMR (500 MHz, DMSO- $d_6$ ):  $\delta$  7.78 (s, 2H), 7.46 (d,  $J$  = 8.5 Hz, 4H), 7.05 (d,  $J$  = 9.0 Hz, 8H), 6.93 (d,  $J$  = 9.0 Hz, 8H), 6.79 (d,  $J$  = 8.5 Hz, 4H), 3.75 (s, 12H) ppm;  $^{13}C$  NMR (125 MHz, DMSO- $d_6$ ):  $\delta$  155.9, 148.1, 144.1,

142.9, 139.7, 136.5, 136.0, 126.8, 125.9, 125.4, 119.3, 117.8, 115.0, 96.0, 55.24 ppm; HRMS (MALDI-TOF)  $m/z$  [ $M^+$ ] calcd for  $C_{50}H_{38}O_4N_2S_2Br_2$ : 952.0640; found: 952.0643.

**Synthesis of C-CPDT.** A heterogeneous mixture of 2M  $K_2CO_3$  (10 mL), THF (14 mL), **4** (0.2 g, 0.21 mmol), (4-(3,6-Dimethoxy-9H-carbazol-9-yl)phenyl)boronic acid (**5**) (0.15 g, 0.44 mmol), and  $Pd(PPh_3)_4$  (0.01 g, 4 mol %) were heated at 80 °C under argon for 18 h. The mixture was extracted with  $CH_2Cl_2$ , and the organic extracts were dried over anhydrous  $MgSO_4$ . Evaporation of the solvent gave a product, which was purified by silica gel column chromatograph with  $CH_2Cl_2$ /hexane (2/1) as eluent to afford the desired product as a red solid in 93% yield. mp > 300 °C;  $^1H$  NMR (500 MHz,  $CDCl_3$ ):  $\delta$  7.84 (d,  $J=2.0$  Hz, 4H), 7.81-7.76 (m, 8H), 7.40 (d,  $J=9.0$  Hz, 4H), 7.20 (d,  $J=8.5$  Hz, 4H), 7.02 (d,  $J=9.0$  Hz, 8H), 6.96-6.90 (m, 12H), 6.69 (d,  $J=8.5$  Hz, 4H), 6.28 (s, 2H), 3.86 (s, 12H), 3.73 (s, 12H) ppm;  $^{13}C$  NMR (125 MHz,  $CDCl_3$ ):  $\delta$  156.3, 154.5, 148.2, 142.4, 140.4, 139.7, 138.9, 136.2, 133.4, 132.6, 127.0, 126.5, 126.0, 124.2, 120.6, 115.5, 115.0, 110.9, 103.3, 56.28, 55.67 ppm; HRMS (MALDI-TOF)  $m/z$  [ $M^+$ ] calcd for  $C_{90}H_{70}N_4O_8S_2$  ( $M^+$ ) 1398.4635 found 1398.4655.

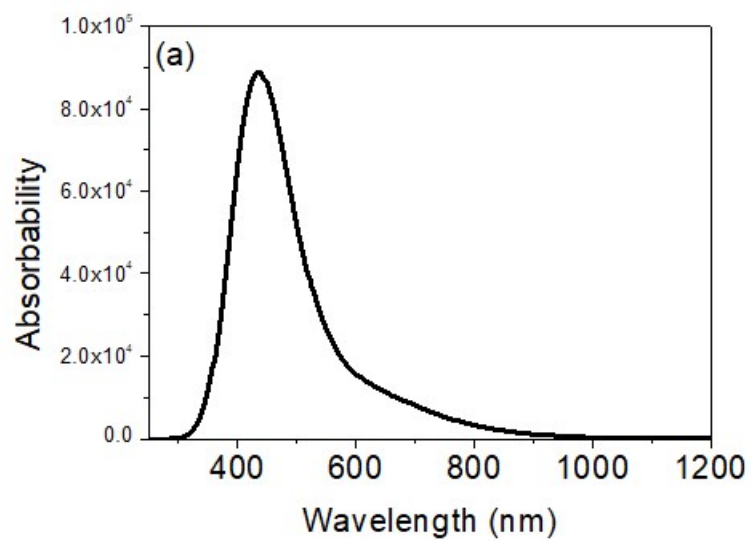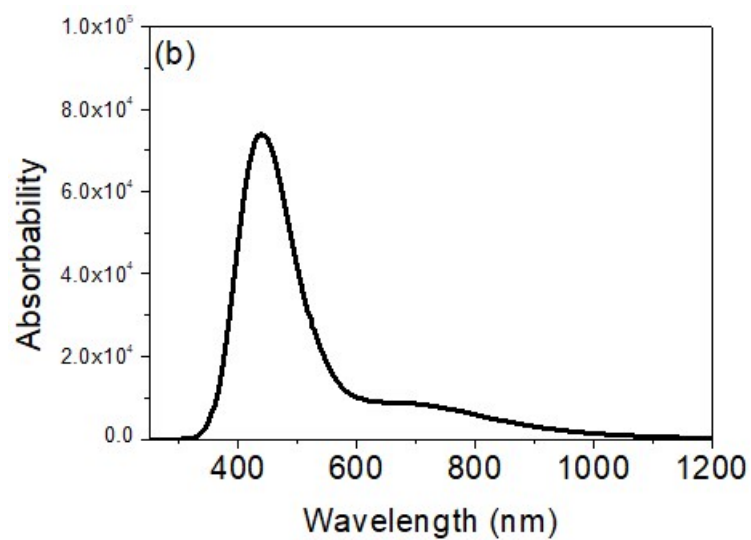

**Fig. S1** Calculated gas-phase absorption spectra of (a) T-CPDT and (b) C-CPDT.

(a)

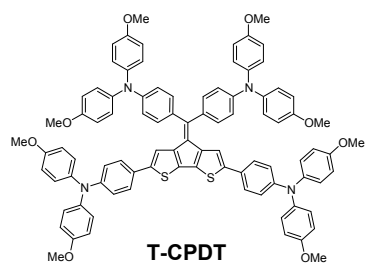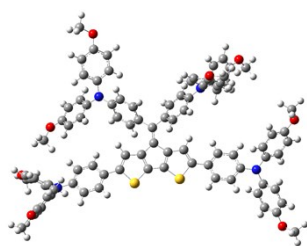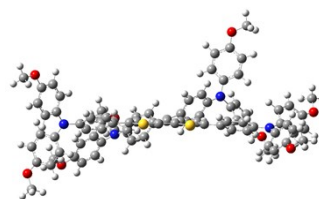

(b)

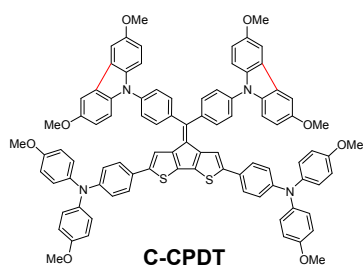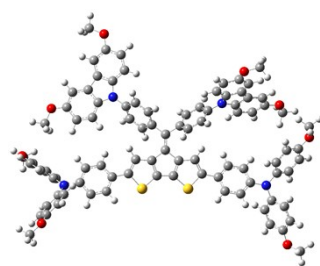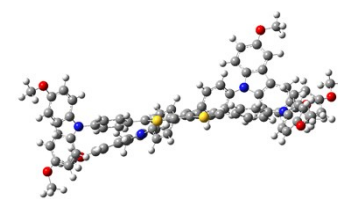

(c)

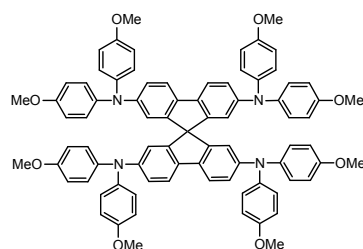

spiro-OMeTAD

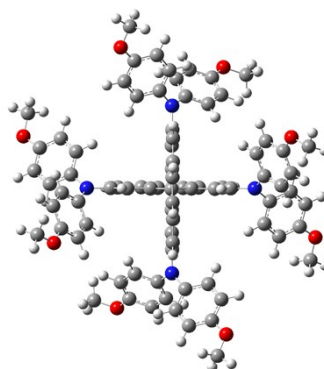

**Fig. S2** The optimized structure of (a) T-CPDT, (b) C-CPDT and (c) spiro-OMeTAD calculated with DFT on B3LYP-6-31G(d,p).



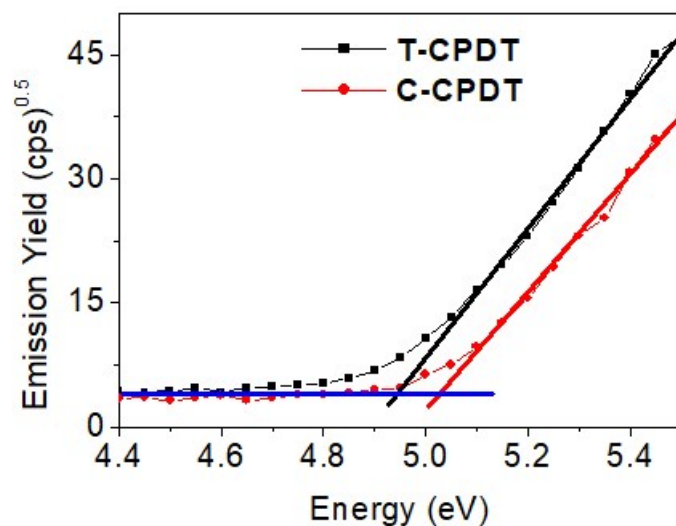

**Fig. S3** Photoemission yield spectra of T-CPDT and C-CPDT in air.

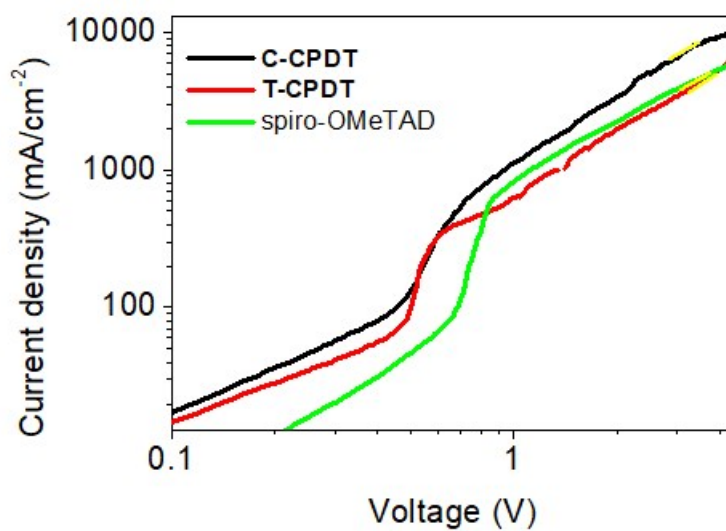

**Fig. S4** Space-charge-limited-current plots in the  $J$ - $V$  characteristics of the devices with T-CPDT, C-CPDT and spiro-OMeTAD as HTM, respectively.

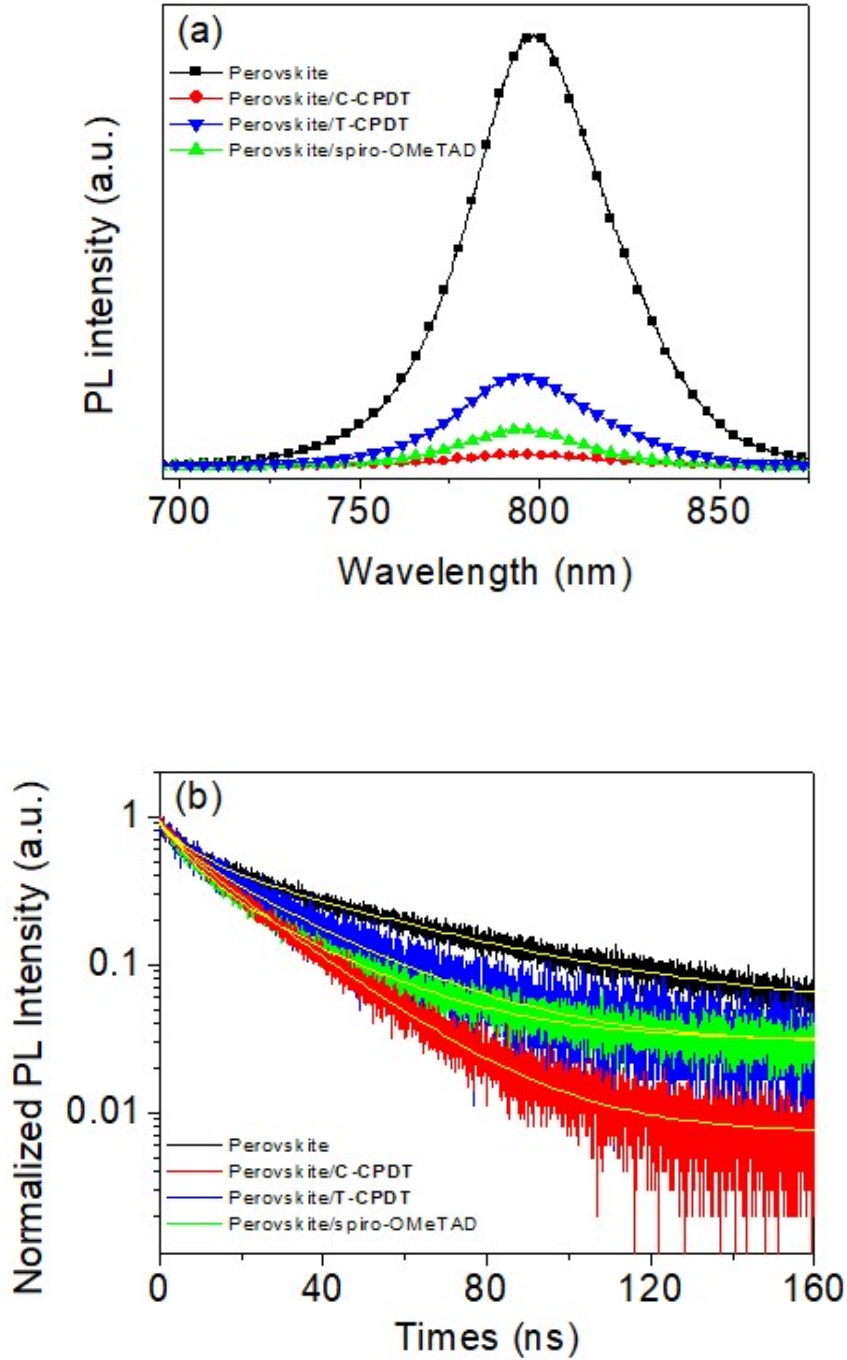

**Fig. S5** (a) Steady-state photoluminescence (PL) spectra of the perovskite film, perovskite/T-CPDT film, perovskite/C-CPDT, and perovskite/spiro-OMeTAD film. (b) Time-resolved photoluminescence (TRPL) spectra of the perovskite film, perovskite/T-CPDT film, perovskite/C-CPDT, and perovskite/spiro-OMeTAD film

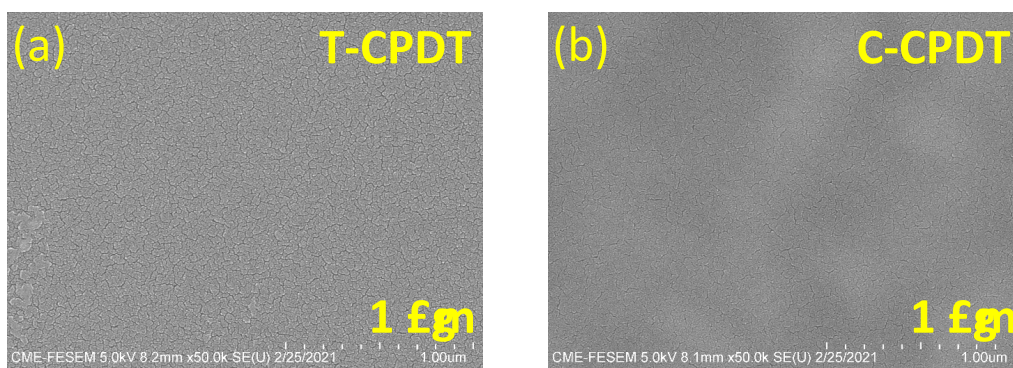

**Fig. S6** The top-view SEM images of (a) T-CPDT and (b) C-CPDT on top of the perovskite film

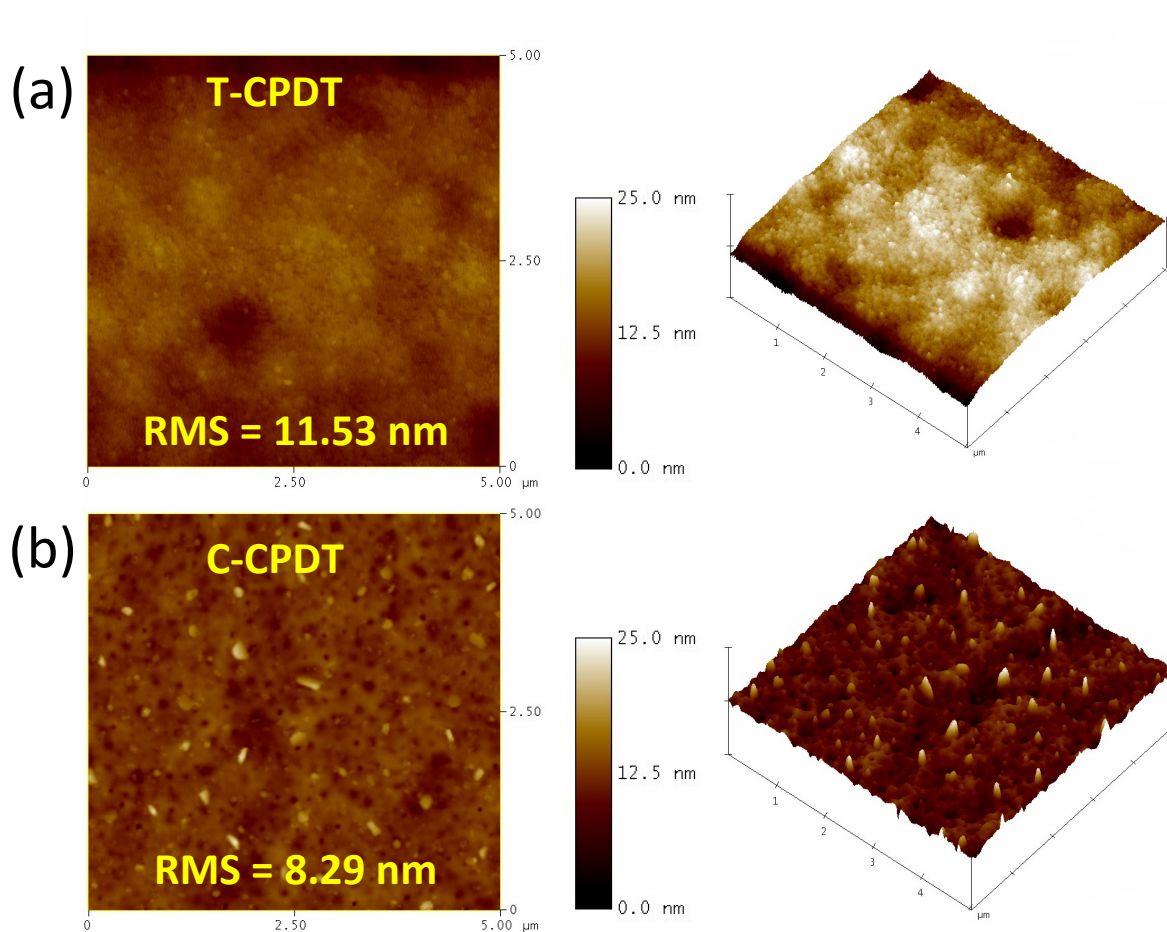

**Fig. S7** AFM micrograms and 3D images of T-CPDT (a) and C-CPDT (b) films deposited on perovskite/mp-TiO<sub>2</sub>/c-TiO<sub>2</sub>/FTO.

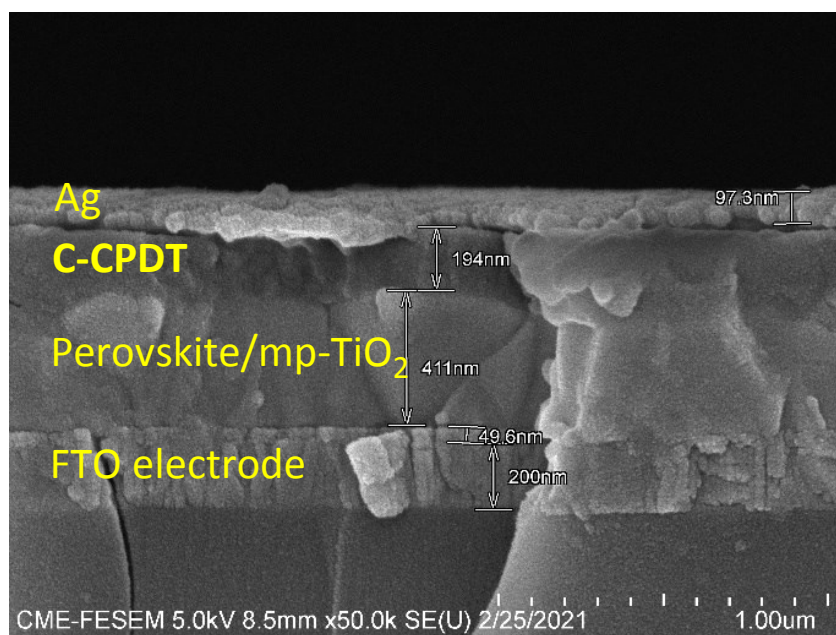

**Fig. S8** Cross-sectional SEM image of the PSC device with **C-CPDT** as HTM.

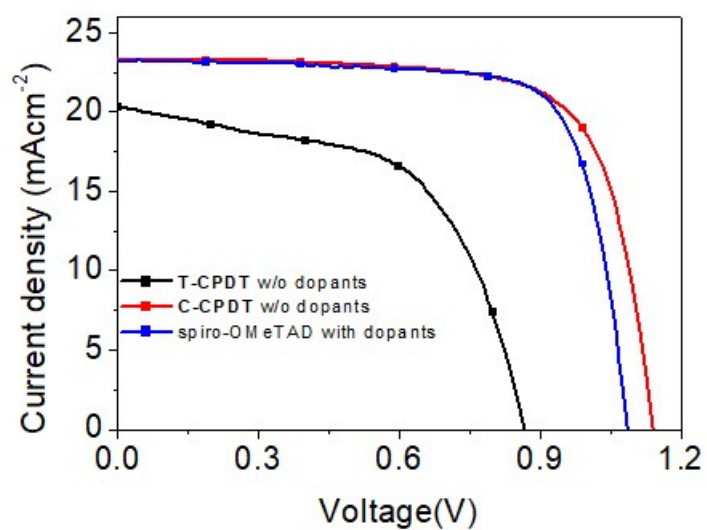

**Fig. S9** Plots of *J-V* curves for the perovskite solar cells using **T-CPDT**, **C-CPDT**, and spiro-OMeTAD as HTM under forward scan (at illumination of 100 mW/cm<sup>2</sup>, AM1.5G).

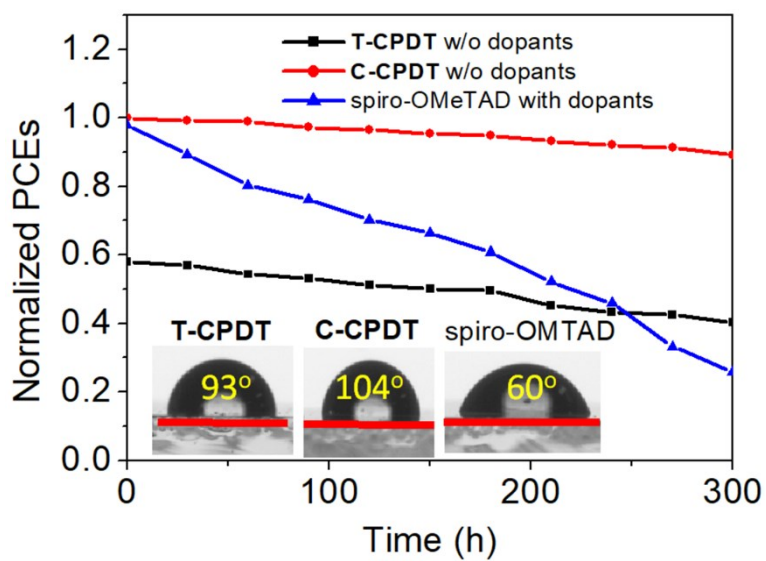

**Fig. S10** Normalized PCEs of the devices with dopant-free T-CPDT, C-CPDT and doped spiro-OMeTAD layers.

```

Current Data Parameters
NAME      CR210423
EXPNO     1
PROCNO    1

F2 - Acquisition Parameters
Date_     20210423
Time      10.41
INSTRUM   spect
PROBHD    5 mm PASBO BB-
PULPROG   zg30
TD         32768
SOLVENT   CDCl3
NS         16
DS         0
SWH        7211.539 Hz
FIDRES     0.220079 Hz
AQ         2.2719147 sec
RG         362
DE         69.333 usec
TE         300.0 K
D1         2.00000000 sec
TD0        1

===== CHANNEL f1 =====
NUC1       1H
P1         15.00 usec
PL1        -1.10 dB
FLLW       13.10554314 MHz
SF01       400.1328009 MHz

F2 - Processing parameters
SI         32768
SF         400.1300102 MHz
WDW        no
SSB        0
LB         0 Hz
GB         0
PC         1.00

```

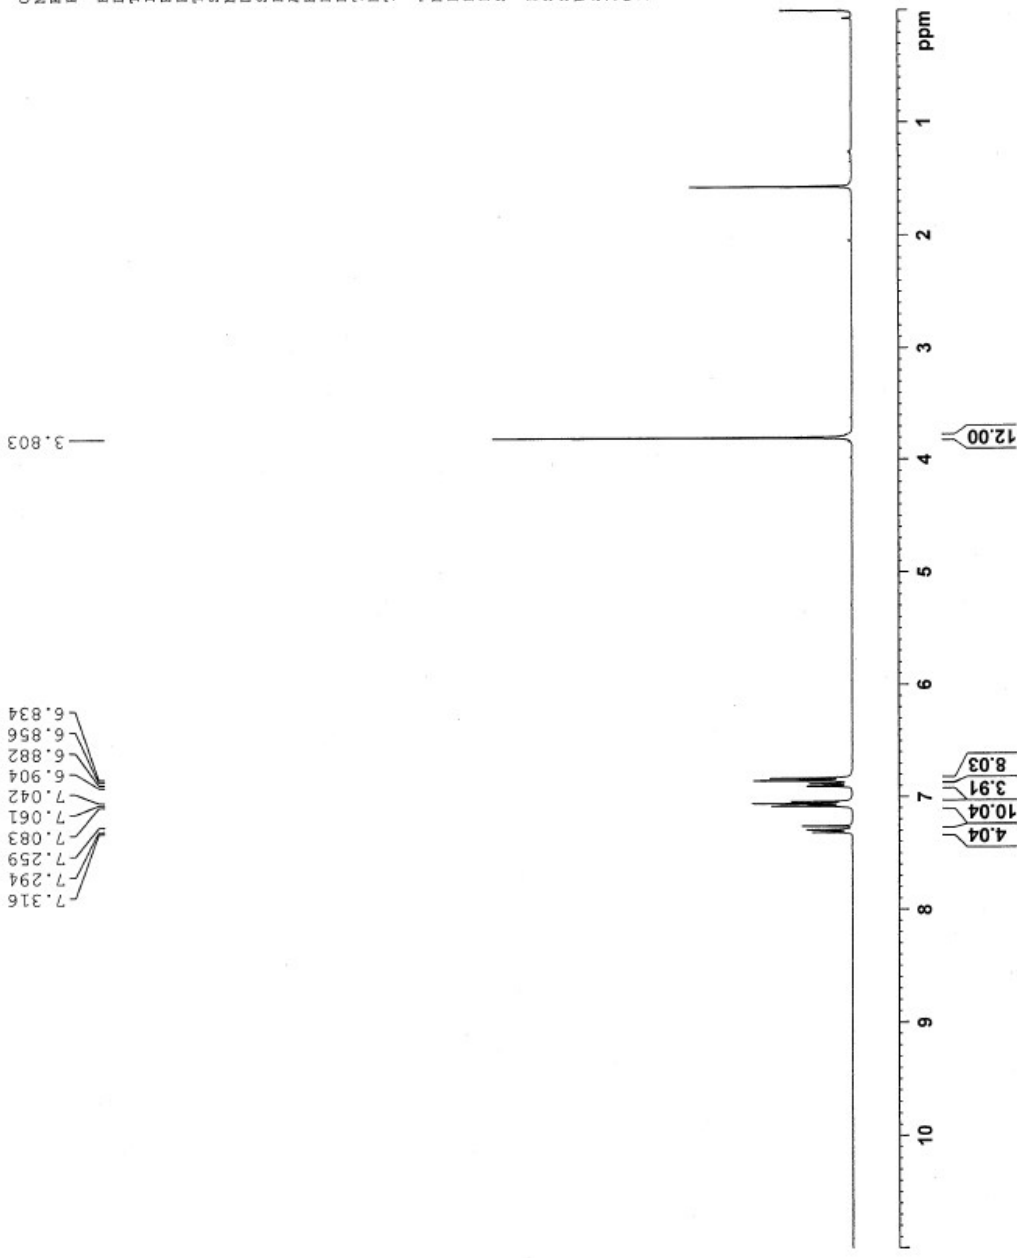

Fig. S11 <sup>1</sup>H NMR spectrum of compound 3.

Current Data Parameters  
 NAME CR210423  
 EXPNO 2  
 PROCNO 1

F2 - Acquisition Parameters  
 Date\_ 20210423  
 Time\_ 14.04  
 INSTRUM spect  
 PROBHD 5 mm CFEBO BB  
 PULPROG zgpg30  
 TD 36358  
 SOLVENT CDCl3  
 NS 273  
 DS 0  
 SWH 30303.03 Hz  
 FIDRES 0.83301 Hz  
 AQ 0.5989070 sec  
 RG 11685.2  
 DW 16.500 usec  
 DE 27.00 usec  
 TE 298.1 K  
 D1 2.0000000 sec  
 D11 0.0300000 sec  
 TD0 1

CHANNEL f1 =====  
 NUC1 13C  
 P1 11.90 usec  
 PL1 0.40 dB  
 PL1W 48.13708115 Hz  
 SFO1 125.7892253 MHz

CHANNEL f2 =====  
 CPDPRG12 waltz16  
 NUC2 1H  
 PCPD2 80.00 usec  
 PL2 0.40 dB  
 PL12 16.39 dB  
 PL13 19.40 dB  
 PL14 16.26515961 W  
 PL15W 0.0450422 W  
 PL13W 0.2025022 W  
 SFO2 500.2020008 MHz

F2 - Processing parameters  
 SI 32768  
 SF 125.7753639 MHz  
 WDW 0  
 SSB 0 EM  
 LB 2.00 Hz  
 GB 0  
 FC 1.00

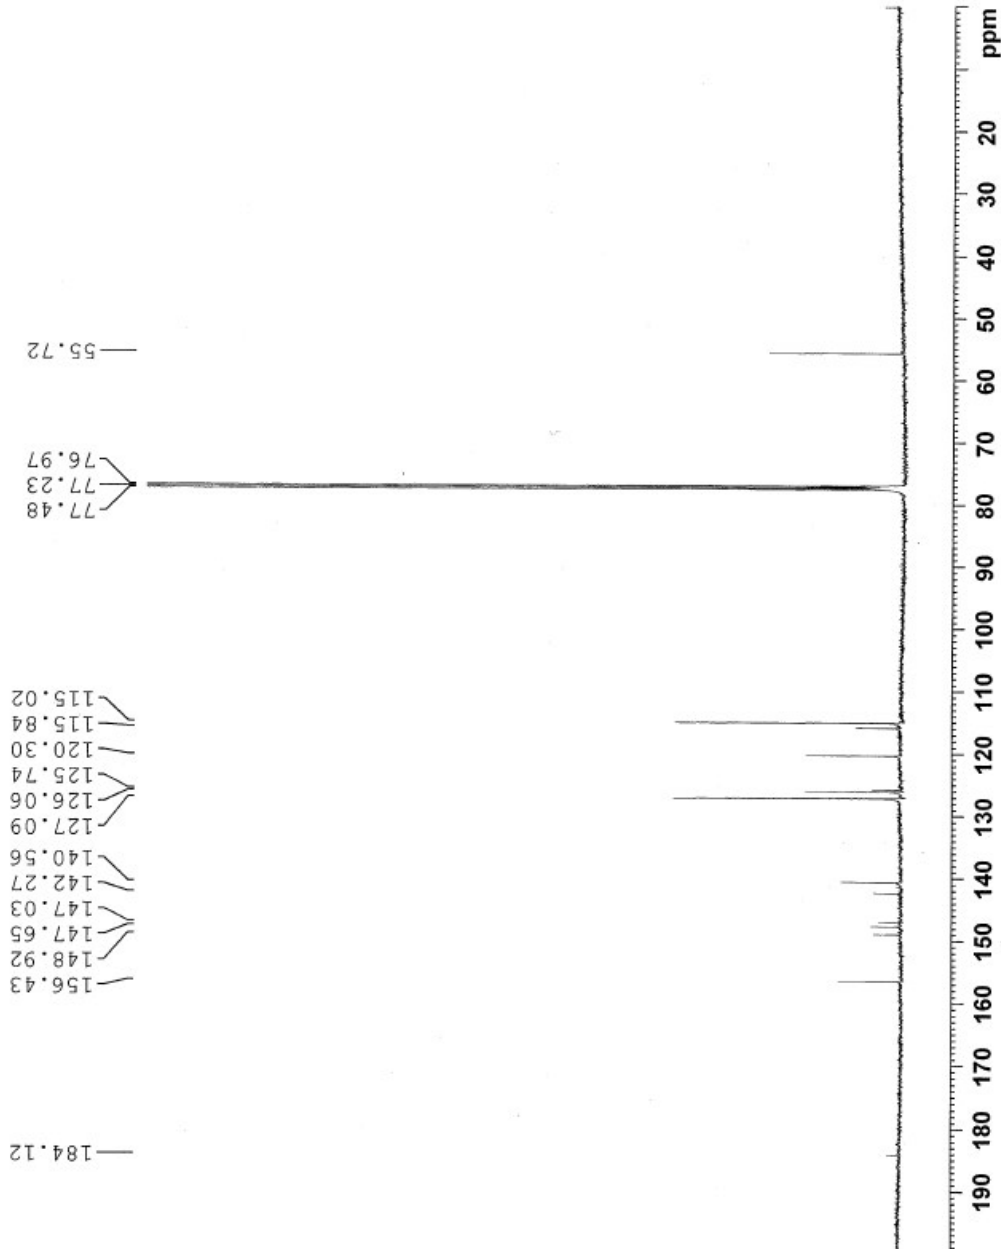

Fig. S12  $^{13}\text{C}$  NMR spectrum of compound 3.



Current Data Parameters  
 NAME CR210429  
 EXPNO 4  
 PROCNO 1

F2 - Acquisition Parameters  
 Date\_ 20210429  
 Time\_ 14.34  
 INSTRUM spect  
 PROBHD 5 mm CPBPBBO BB  
 PULPROG zg30  
 TD 32768  
 SOLVENT DMSO  
 NS 9  
 DS 0  
 SWH 8992.806 Hz  
 FIDRES 0.274439 Hz  
 AQ 1.8219008 sec  
 RG 181  
 DW 55.600 usec  
 DE 25.00 usec  
 TE 298.0 K  
 D1 2.00000000 sec  
 TDO 1

----- CHANNEL f1 -----  
 NUC1 1H  
 P1 12.00 usec  
 PL1 0.40 dB  
 PL1W 16.26515961 W  
 SF01 500.2035014 MHz

F2 - Processing parameters  
 SI 32768  
 SF 500.2000027 MHz  
 NDM 0  
 SSI 0  
 LB 0 Hz  
 GB 0  
 PC 1.00

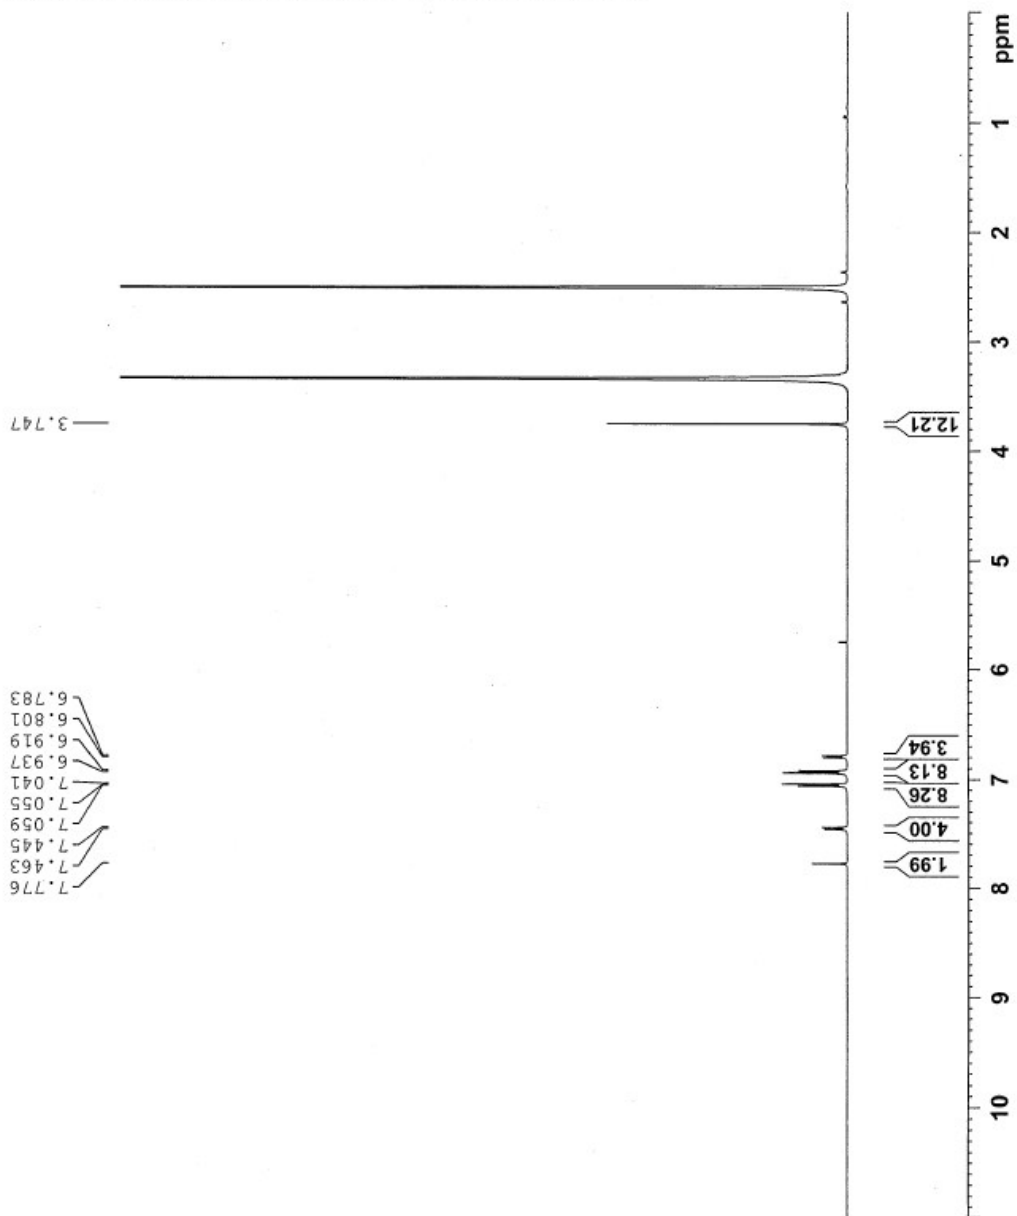

Fig. S13  $^1\text{H}$  NMR spectrum of compound 4.



```

Current Data Parameters
NAME      CR210505
EXPNO     1
PROCNO    1

F2 - Acquisition Parameters
Date_     20210505
Time      14.35
INSTRUM   spect
PROBHD    5 mm CFBEB BB
PULPROG   zgpg30
TD         36196
SOLVENT   DMSO
NS         1801
DS         0
SWH        30303.031 Hz
FIDRES     0.937193 Hz
AQ         0.572234 sec
RG         7298.2
DE         16.506 usec
TE         298.0 K
D1         2.00000000 sec
D11        0.03000000 sec
TD0        1

===== CHANNEL f1 =====
NUC1       13C
P1         11.90 usec
PL1        1.60 dB
PL1W       48.13708115 W
SFO1       125.7892253 MHz

===== CHANNEL f2 =====
CPDPRG12  waltz16
NUC2       1H
PCPD2      80.00 usec
PL2         0.40 dB
PL12       16.39 dB
PL13       19.40 dB
PL2W       16.26515961 W
PL1ZW      0.40950423 W
PL1SW      0.20476626 W
SFO2       500.2020008 MHz

F2 - Processing Parameters
SI         32768
SF         125.7754518 MHz
WDW        EM
SSB        0
LB         2.00 Hz
GB         0
PC         1.00

```

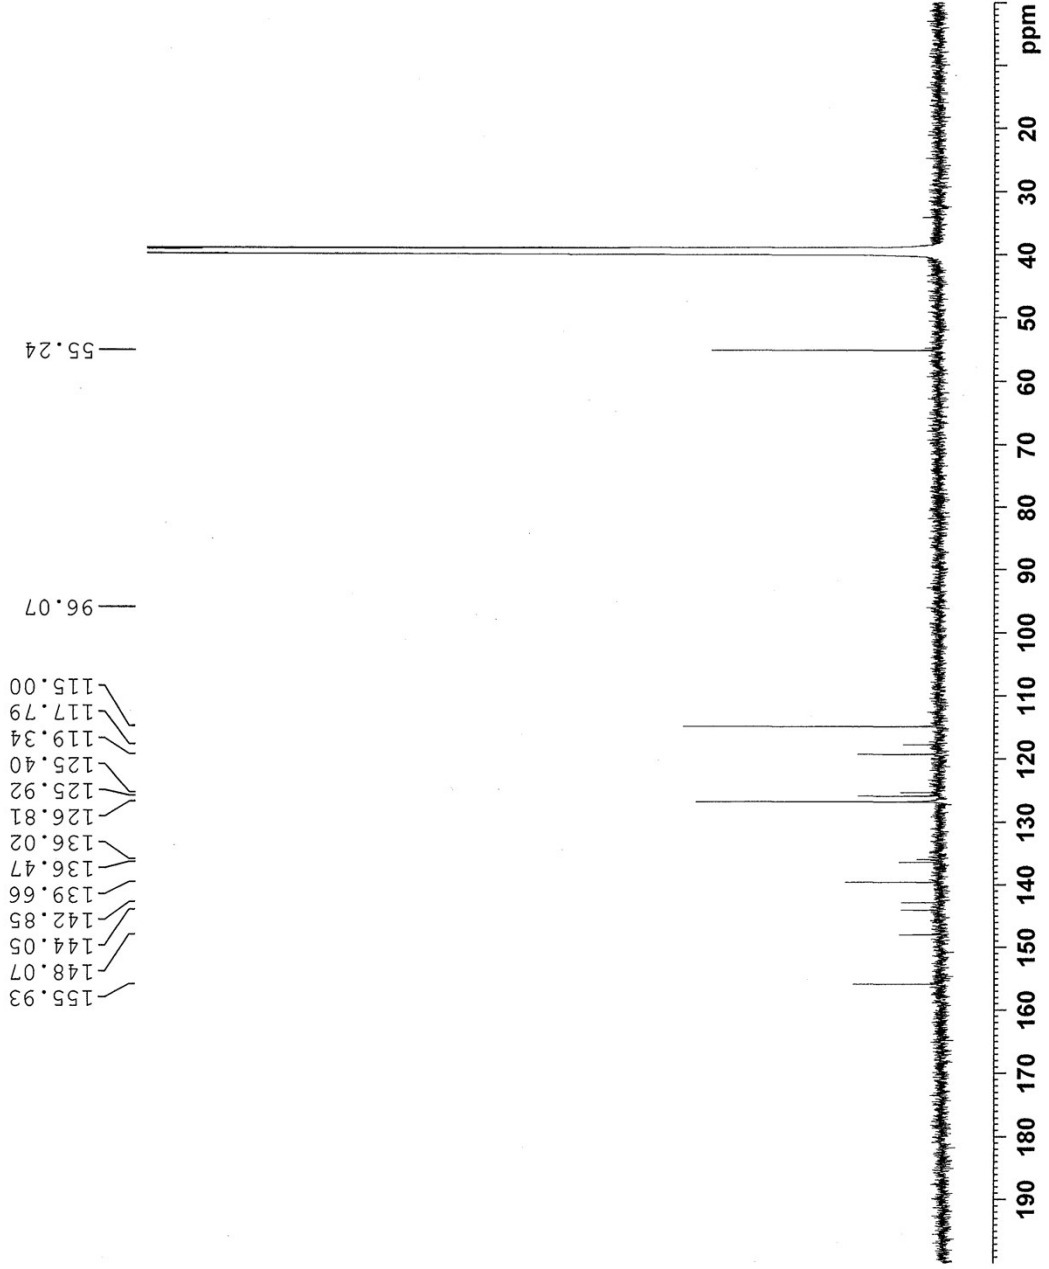

Fig. S14 <sup>13</sup>C NMR spectrum of compound 4.

```

Current Data Parameters
NAME      CR210429
EXPNO    3
PROCNO   1

F2 - Acquisition Parameters
Date_    20210429
Time     14.30
INSTRUM spect
PROBHD   5 mm CPFBBO BB
PULPROG zg30
TD       32768
SOLVENT  DMSO
NS       10
DS       0
SWH      8992.806 Hz
FIDRES   0.271439 Hz
AQ       1.8219008 sec
RG       161.3
DW       55.600 usec
DE       25.00 usec
TE       298.0 K
D1       2.00000000 sec
TD0      1

===== CHANNEL f1 =====
NUC1     1H
P1       12.00 usec
PL1      0.40 dB
PL1W    16.26515961 W
SF01     500.2035014 MHz

F2 - Processing parameters
SI       32768
SF       500.2000031 MHz
WDW      no
SSB      0
LB       0 Hz
GB       0
PC       1.00

```

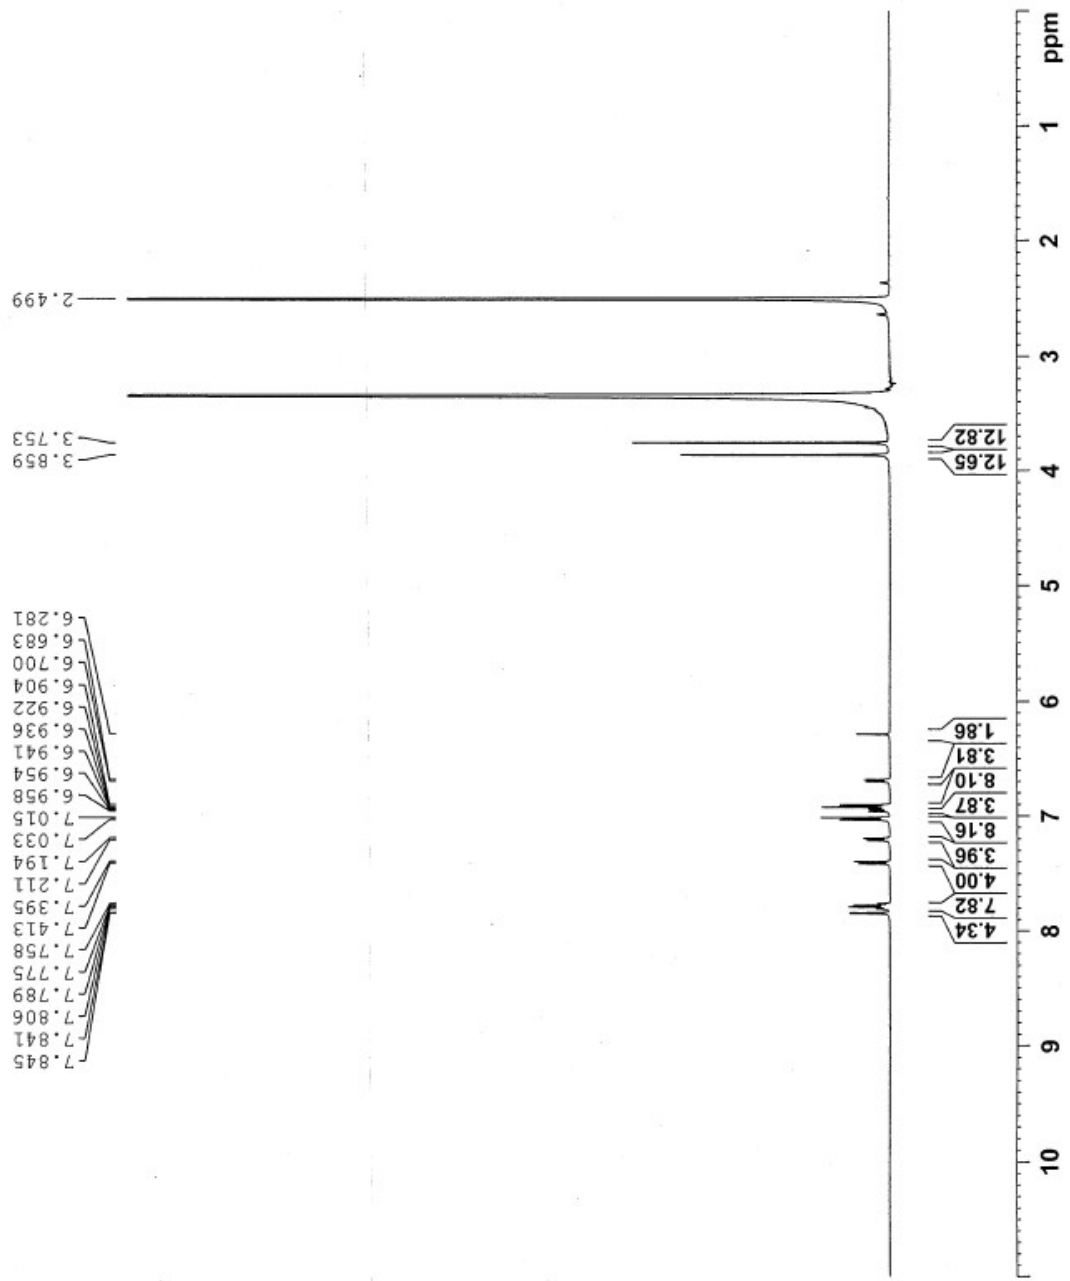

Fig. S15 <sup>1</sup>H NMR spectrum of compound C-CPDT.

```

Current Data Parameters
NAME      CR210427
EXNO     2
PROCNO   1

F2 - Acquisition Parameters
Date_    20210427
Time_    14.20
INSTRUM  spect
PROBHD   5 mm CPBAG0 BB
PULPROG  zgpg30
TD        36196
SOLVENT  CDCl3
NS        3000
DS        0
SWH       30303.031 Hz
FIDRES    0.637193 Hz
AQ        0.5972340 sec
RG        7296.2
DR        19,500 usec
DE        29.00 usec
TE        298 K
D1        2.00000000 sec
D11       0.03000000 sec
D10       0.03000000 sec
TD0       1

===== CHANNEL F1 =====
NUC1      13C
P1        11.90 usec
PL1       1.60 dB
PL1W      48.13708115 W
SFO1      125.7892253 MHz

===== CHANNEL F2 =====
CPDPRG12  waltz16
NUC2      1H
P2        80.40 usec
PL2       0.40 dB
PL2W      16.39 dB
PL13      19.40 dB
PL14      19.40 dB
PL15      16.26515961 W
PL16W     0.40950423 W
PL17W     0.20476626 W
SFO2      500.2020008 MHz

F2 - Processing Parameters
SI        32768
SF        125.7753850 MHz
WDW       EM
SSB       0
LB        0
GB        0
PC        1.00

```

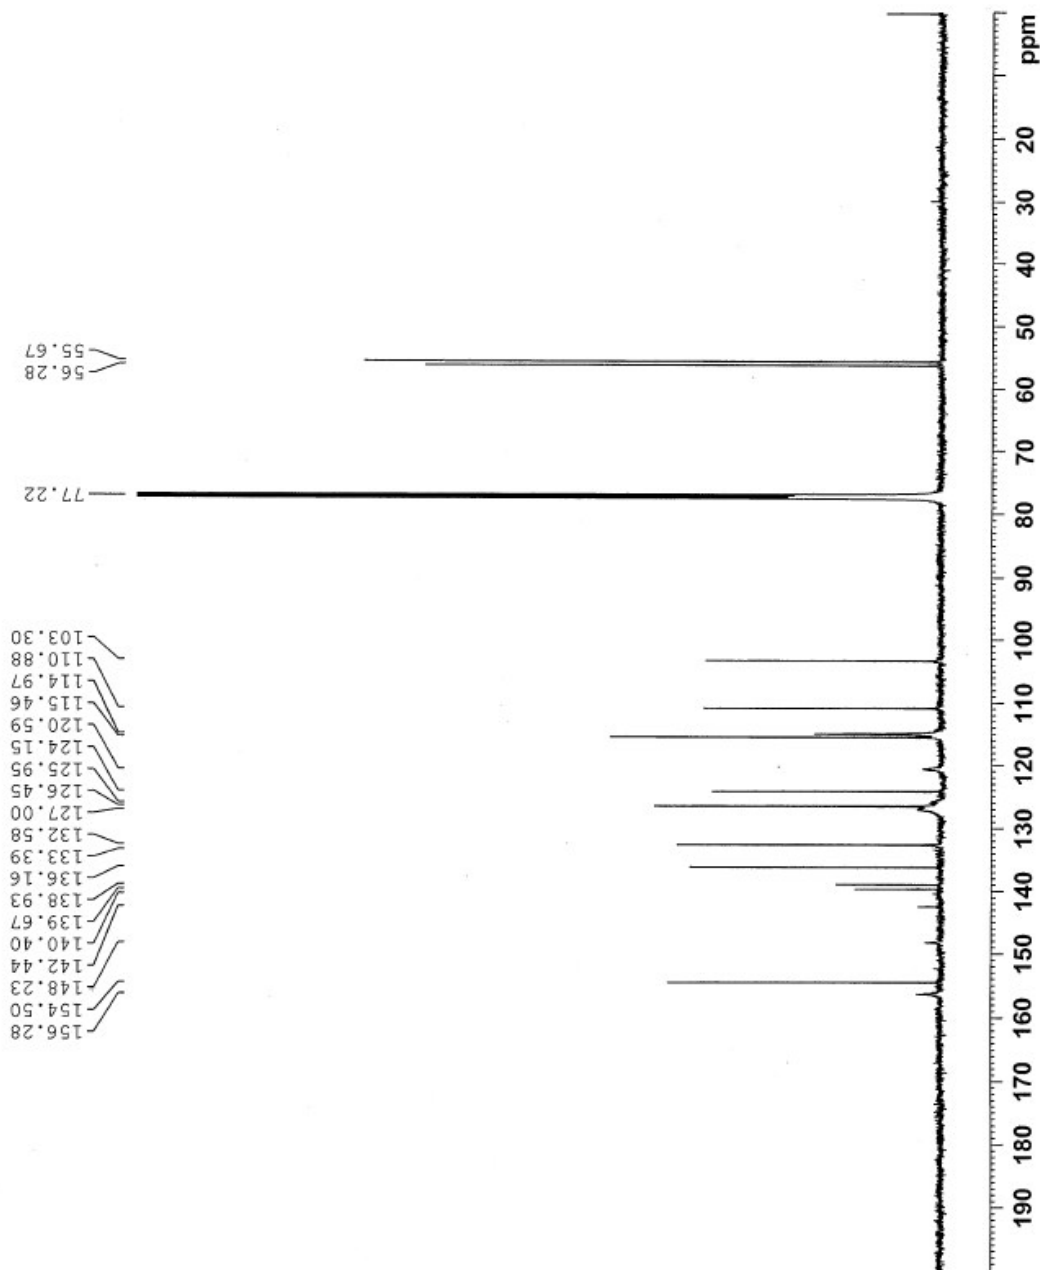

Fig. S16 <sup>13</sup>C NMR spectrum of compound C-CPDT.

Table S1 Calculated TDDFT excitation energies ( $E$ ), oscillator strengths ( $f$ ), MO compositions and characters based on DFT at the B3LYP/6-31G (d,p) level.

| HTM           | $n^a$ | $E$ (ev, nm) | $f$  | Composition       |
|---------------|-------|--------------|------|-------------------|
| <b>T-CPDT</b> | 1     | 1.96 (634)   | 0.23 | 100% HOMO→LUMO    |
|               | 2     | 2.51 (495)   | 0.41 | 88% HOMO-1→LUMO   |
|               | 5     | 2.87 (432)   | 1.19 | 62% HOMO→LUMO+1   |
|               | 6     | 2.97 (418)   | 0.58 | 72% HOMO-4→LUMO   |
|               | 7     | 3.32 (373)   | 0.13 | 37% HOMO-1→LUMO+1 |
| <b>C-CPDT</b> | 1     | 1.77 (701)   | 0.20 | 98% HOMO→LUMO     |
|               | 3     | 2.50 (497)   | 0.18 | 94% HOMO-2→LUMO   |
|               | 5     | 2.42 (457)   | 0.19 | 88% HOMO-4→LUMO+2 |
|               | 6     | 2.86 (433)   | 1.49 | 87% HOMO-1→LUMO+1 |

Table S2 Summary of the fitting results and corresponding dynamic parameters derived from TRPL decay traces.

| HTM           | $A_1$ | $\tau_1$ (ns) | $A_2$ | $\tau_2$ (ns) | $\tau_{avg.}$ (ns) |
|---------------|-------|---------------|-------|---------------|--------------------|
| none          | 0.61  | 47.31         | 0.39  | 7.48          | 31.78              |
| <b>T-CPDT</b> | 0.72  | 27.44         | 0.28  | 5.82          | 21.39              |
| <b>C-CPDT</b> | 0.51  | 25.8          | 0.49  | 6.96          | 16.57              |

Table S3 Photovoltaic parameters of the best-performing PSCs with dopant-free **T-CPDT** and **C-CPDT** and doped spiro-OMeTAD as HTMs

| HTM           | Scan direaction | $V_{oc}$ [V] | $J_{sc}$ [mA cm <sup>-2</sup> ] | FF (%) | PCE <sub>max</sub> [%] |
|---------------|-----------------|--------------|---------------------------------|--------|------------------------|
| <b>T-CPDT</b> | reverse         | 0.88         | 21.37                           | 60.9   | 11.45                  |
|               | forward         | 0.87         | 20.29                           | 57.0   | 10.06                  |
| <b>C-CPDT</b> | reverse         | 1.14         | 23.27                           | 74.2   | 19.68                  |
|               | forward         | 1.14         | 23.29                           | 72.8   | 19.33                  |
| spiro-OMeTAD  | reverse         | 1.09         | 23.42                           | 75.5   | 19.27                  |
|               | forward         | 1.09         | 23.25                           | 75.4   | 19.11                  |

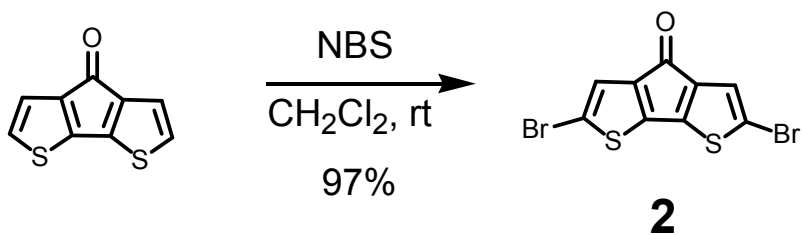

Table S4 Cost Calculation of Compound **2**

| Reagent                                     | Amount<br>(g) | Amount<br>(mL) | Price<br>(\$/g or<br>\$/mL) | Total Price<br>(\$) |
|---------------------------------------------|---------------|----------------|-----------------------------|---------------------|
| 4H-cyclopenta[2,1-b:3,4-b']dithiophen-4-one | 1.00          |                | 233                         | 233                 |
| Water                                       |               | 50             | 0.0                         | 0.00                |
| Dichloromethane                             |               | 50             | 0.0149                      | 0.745               |
| Hexane                                      |               | 400            | 0.0011                      | 0.44                |
| N-bromosuccinimide                          | 1.94          |                | 0.1012                      | 0.196               |
| MgSO <sub>4</sub>                           | 3             |                | 0.06                        | 0.18                |
| Silica gel                                  | 100           |                | 0.0042                      | 0.42                |
| Total Cost                                  |               |                | 234.981 \$                  |                     |
| Total amount of compound <b>2</b>           |               |                | 1.77 g                      |                     |
| Cost of compound <b>2</b>                   |               |                | 132.758 \$/g                |                     |

Table S5 Cost calculation of **3**

| Reagent                                                                                                                 | Amount<br>(g) | Amount<br>(mL) | Price<br>(\$/g or<br>\$/mL) | Total<br>Price<br>(\$) |
|-------------------------------------------------------------------------------------------------------------------------|---------------|----------------|-----------------------------|------------------------|
| <b>compound 2</b>                                                                                                       | 0.8           |                | 132.758                     | 106.206                |
| 4-methoxy-N-(4-methoxyphenyl)-<br>N-(4-(4,4,5,5-tetramethyl-1,3,2-dioxaborolan-2-<br>yl)<br>phenyl)aniline ( <b>1</b> ) | 2.07          |                | 8.99 <sup>a</sup>           | 18.609                 |
| Pd(PPh <sub>3</sub> ) <sub>4</sub>                                                                                      | 0.109         |                | 323.6                       | 35.27                  |

|                                |              |     |        |        |
|--------------------------------|--------------|-----|--------|--------|
| K <sub>2</sub> CO <sub>3</sub> | 3.32         |     | 0.03   | 0.0996 |
| Water                          |              | 100 | 0.00   | 0.00   |
| THF                            |              | 16  | 0.034  | 0.544  |
| MgSO <sub>4</sub>              | 3            |     | 0.06   | 0.18   |
| Hexane                         |              | 400 | 0.0011 | 0.44   |
| Dichloromethane                |              | 400 | 0.0149 | 5.96   |
| Silica gel                     | 200          |     | 0.0042 | 0.84   |
| Total Cost                     | 168.149 \$   |     |        |        |
| Total amount of <b>3</b>       | 1.50 g       |     |        |        |
| Cost of <b>3</b>               | 112.099 \$/g |     |        |        |

Table S6 Cost calculation of **4**

| Reagent                        | Amount<br>(g) | Amount<br>(mL) | Price<br>(\$/g or \$/mL) | Total Price (\$) |
|--------------------------------|---------------|----------------|--------------------------|------------------|
| <b>compound 3</b>              | 0.4           |                | 112.099                  | 44.840           |
| CBr <sub>4</sub>               | 0.2           |                | 0.79                     | 0.158            |
| P( <i>o</i> -iPr) <sub>3</sub> | 0.19          |                | 0.679                    | 0.129            |
| Water                          |               | 100            | 0.00                     | 0.00             |
| MgSO <sub>4</sub>              | 3             |                | 0.06                     | 0.18             |
| Hexane                         |               | 250            | 0.0011                   | 0.275            |
| Dichloromethane                |               | 250            | 0.0149                   | 3.725            |
| Silica gel                     | 100           |                | 0.0042                   | 0.42             |
| Total Cost                     | 49.727 \$     |                |                          |                  |
| Total amount of <b>4</b>       | 0.41 g        |                |                          |                  |
| Cost of <b>4</b>               | 121.285 \$/g  |                |                          |                  |

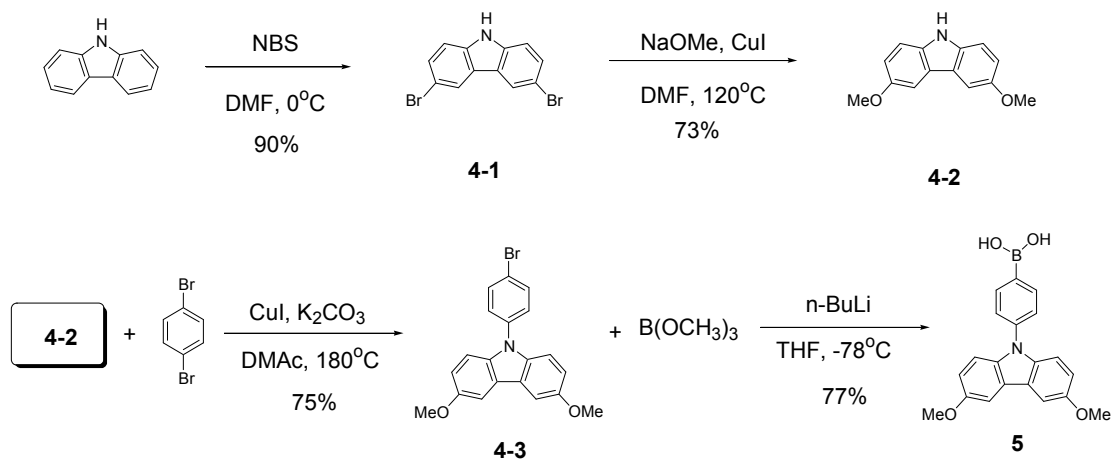

Table S7 Cost Calculation of Compound **4-1**

| Reagent                                                             | Amount<br>(g) | Amount<br>(mL) | Price<br>(\$/g or \$/mL) | Total Price (\$) |
|---------------------------------------------------------------------|---------------|----------------|--------------------------|------------------|
| Carbazole                                                           | 1             |                | 0.234                    | 0.234            |
| DMF                                                                 |               | 20             | 0.02                     | 0.40             |
| Water                                                               |               | 50             | 0.0                      | 0.00             |
| Dichloromethane                                                     |               | 50             | 0.0149                   | 0.745            |
| <i>N</i> -bromosuccinimide                                          | 2.235         |                | 0.1012                   | 0.226            |
| MgSO <sub>4</sub>                                                   | 5             |                | 0.06                     | 0.30             |
| Hexane                                                              |               | 150            | 0.0011                   | 0.165            |
| Dichloromethane                                                     |               | 50             | 0.0149                   | 0.745            |
| Silica gel                                                          | 100           |                | 0.0042                   | 0.42             |
| Total Cost                                                          |               |                | 3.235 \$                 |                  |
| Total amount of compound<br>3,6-dibromo-9H-carbazole ( <b>4-1</b> ) |               |                | 1.749 g                  |                  |
| Cost of 3,6-dibromo-9H-carbazole ( <b>4-1</b> )                     |               |                | 1.850 \$/g               |                  |

Table S8 Cost Calculation of Compound **4-2**

| Reagent                                                           | Amount<br>(g) | Amount<br>(mL) | Price<br>(\$/g or \$/mL) | Total Price (\$) |
|-------------------------------------------------------------------|---------------|----------------|--------------------------|------------------|
| 3,6-dibromo-9H-carbazole ( <b>4-1</b> )                           | 4             |                | 1.850                    | 7.40             |
| DMF                                                               |               | 130            | 0.02                     | 2.6              |
| Water                                                             |               | 50             | 0.0                      | 0.00             |
| Dichloromethane                                                   |               | 400            | 0.0149                   | 5.96             |
| NaOMe                                                             |               | 67             | 0.036                    | 2.412            |
| CuI                                                               | 9.85          |                | 0.536                    | 5.2796           |
| MgSO <sub>4</sub>                                                 | 5             |                | 0.06                     | 0.30             |
| Hexane                                                            |               | 1000           | 0.0011                   | 1.10             |
| Silica gel                                                        | 400           |                | 0.0042                   | 1.68             |
| Total Cost                                                        | 26.732 \$     |                |                          |                  |
| Total amount of compound<br>3,6-dimethoxycarbazole ( <b>4-2</b> ) | 2.04 g        |                |                          |                  |
| Cost of 3,6-<br>dimethoxycarbazole ( <b>4-2</b> )                 | 13.104 \$/g   |                |                          |                  |

Table S9 Cost Calculation of Compound **4-3**

| Reagent                               | Amount<br>(g) | Amount<br>(mL) | Price<br>(\$/g or<br>\$/mL) | Total Price<br>(\$) |
|---------------------------------------|---------------|----------------|-----------------------------|---------------------|
| 3,6-dimethoxycarbazole ( <b>4-2</b> ) | 0.91          |                | 13.104                      | 11.925              |
| 1,4-dibromobenzene                    | 3.76          |                | 0.28                        | 1.0528              |
| Water                                 |               | 50             | 0.0                         | 0.00                |
| Dichloromethane                       |               | 50             | 0.0149                      | 0.745               |
| K <sub>2</sub> CO <sub>3</sub>        | 1.6           |                | 0.03                        | 0.048               |
| CuI                                   | 0.4           |                | 0.536                       | 0.2144              |
| DMAc                                  |               | 25             | 0.20                        | 5.0                 |
| MgSO <sub>4</sub>                     | 2             |                | 0.06                        | 0.12                |
| Hexane                                |               | 200            | 0.0011                      | 0.22                |
| Silica gel                            | 100           |                | 0.0042                      | 0.42                |
| Total Cost                            | 19.745 \$     |                |                             |                     |
| Total amount of compound 9-(4-        | 1.148 g       |                |                             |                     |



|                                                                      |             |
|----------------------------------------------------------------------|-------------|
| Bromo-phenyl)-3,6-dimethoxy-9H-carbazole ( <b>4-3</b> )              |             |
| Cost of 9-(4-Bromo-phenyl)-3,6-dimethoxy-9H-carbazole ( <b>4-3</b> ) | 17.199 \$/g |

Table S10 Cost Calculation of Compound 5

| Reagent                                                                             | Amount (g)  | Amount (mL) | Price (\$/g or \$/mL) | Total Price (\$) |
|-------------------------------------------------------------------------------------|-------------|-------------|-----------------------|------------------|
| 9-(4-Bromo-phenyl)-3,6-dimethoxy-9H-carbazole ( <b>4-3</b> )                        | 0.76        |             | 17.199                | 13.071           |
| B(OCH <sub>3</sub> ) <sub>3</sub>                                                   |             | 0.63        | 0.125                 | 0.0788           |
| Water                                                                               |             | 50          | 0.0                   | 0.00             |
| Dichloromethane                                                                     |             | 100         | 0.0149                | 1.49             |
| HCl                                                                                 | 0.876       |             | 0.0602                | 0.0527           |
| n-BuLi                                                                              |             | 1.5         | 0.0119                | 0.01785          |
| MgSO <sub>4</sub>                                                                   | 2           |             | 0.06                  | 0.12             |
| Hexane                                                                              |             | 100         | 0.0011                | 0.11             |
| Silica gel                                                                          | 80          |             | 0.0042                | 0.336            |
| Total Cost                                                                          | 15.276 \$   |             |                       |                  |
| Total amount of (4-(3,6-Dimethoxy-9H-carbazol-9-yl)phenyl)boronic acid ( <b>5</b> ) | 0.53 g      |             |                       |                  |
| Cost of (4-(3,6-Dimethoxy-9H-carbazol-9-yl)phenyl)boronic acid ( <b>5</b> )         | 28.823 \$/g |             |                       |                  |

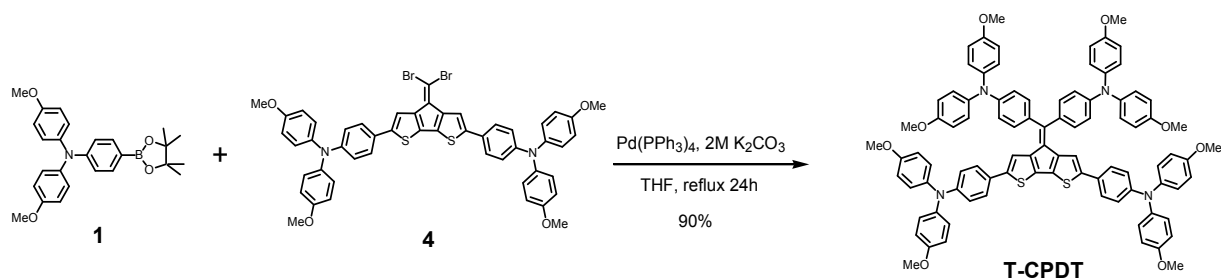

Table S11 Cost Calculation of Compound T-CPDT

| Reagent                                                                                                             | Amount<br>(g) | Amount<br>(mL) | Price<br>(\$/g or<br>\$/mL) | Total Price (\$) |
|---------------------------------------------------------------------------------------------------------------------|---------------|----------------|-----------------------------|------------------|
| <b>compound 4</b>                                                                                                   | 0.2           |                | 121.285                     | 24.257           |
| 4-methoxy-N-(4-methoxyphenyl)-<br>N-(4-(4,4,5,5-tetramethyl-1,3,2-dioxaborolan-2-yl)<br>phenyl)aniline ( <b>1</b> ) | 0.19          |                | 8.99 <sup>a</sup>           | 1.7081           |
| $\text{Pd(PPh}_3)_4$                                                                                                | 0.01          |                | 323.6                       | 3.236            |
| $\text{K}_2\text{CO}_3$                                                                                             | 2.76          |                | 0.03                        | 0.0828           |
| Water                                                                                                               |               | 50             | 0.00                        | 0.00             |
| THF                                                                                                                 |               | 14             | 0.034                       | 0.476            |
| $\text{MgSO}_4$                                                                                                     | 3             |                | 0.06                        | 0.18             |
| Hexane                                                                                                              |               | 400            | 0.0011                      | 0.44             |
| Dichloromethane                                                                                                     |               | 600            | 0.0149                      | 8.94             |
| Silica gel                                                                                                          | 100           |                | 0.0042                      | 0.42             |
| <b>Total Cost</b>                                                                                                   |               |                | 39.290 \$                   |                  |
| Total amount of <b>T-CPDT</b>                                                                                       |               |                | 0.264 g                     |                  |
| Cost of <b>C-CPDT</b>                                                                                               |               |                | 148.826 \$/g                |                  |

Table S12 Cost Calculation of Compound C-CPDT

| Reagent                          | Amount<br>(g) | Amount<br>(mL) | Price<br>(\$/g or<br>\$/mL) | Total Price<br>(\$) |
|----------------------------------|---------------|----------------|-----------------------------|---------------------|
| <b>compound 4</b>                | 0.2           |                | 121.285                     | 24.257              |
| (4-(3,6-Dimethoxy-9H-carbazol-9- | 0.15          |                | 28.823                      | 4.323               |

|                                    |              |     |        |        |
|------------------------------------|--------------|-----|--------|--------|
| yl)phenyl)boronic acid (5)         |              |     |        |        |
| Pd(PPh <sub>3</sub> ) <sub>4</sub> | 0.01         |     | 323.6  | 3.236  |
| K <sub>2</sub> CO <sub>3</sub>     | 2.76         |     | 0.03   | 0.0828 |
| Water                              |              | 50  | 0.00   | 0.00   |
| THF                                |              | 14  | 0.034  | 0.476  |
| MgSO <sub>4</sub>                  | 3            |     | 0.06   | 0.18   |
| Hexane                             |              | 400 | 0.0011 | 0.44   |
| Dichloromethane                    |              | 600 | 0.0149 | 8.94   |
| Silica gel                         | 100          |     | 0.0042 | 0.42   |
| <b>Total Cost</b>                  | 42.355 \$    |     |        |        |
| Total amount of <b>C-CPDT</b>      | 0.27 g       |     |        |        |
| Cost of <b>C-CPDT</b>              | 156.870 \$/g |     |        |        |

a Y.-S. Lin, S. Y. Abate, K.-W. Lai, C.-W. Chu, Y.-D. Lin, Y.-T. Tao, S.-S. Sun, *ACS Appl. Mater. Interfaces* 2018, **10**, 41439–41449.

#### References:

S1. M. J. Frisch, G. W. Trucks, H. B. Schlegel, G. E. Scuseria, M.A. Robb, J. R. Cheeseman, J. A. Montgomery Jr., T. Vreven, K. N.Kudin, J. C. Burant, J. M. Millam, S. S. Iyengar, J. Tomasi, V.Barone, B. Mennucci, M. Cossi, G. Scalmani, N. Rega, G. A.Petersson, H. Nakatsuji, M. Hada, M. Ehara, K. Toyota, R. Fukuda, J.Hasegawa, M. Ishida, T. Nakajima, Y. Honda, O. Kitao, H. Nakai, M.Klene, X. Li, J. E. Knox, H. P. Hratchian, J. B. Cross, V. Bakken, C. Adamo, J.Jaramillo, R. Gomperts, R. E. Stratmann, O. Yazyev, A. J. Austin,R. Cammi, C. Pomelli, J. W. Ochterski, P. Y. Ayala, K. Morokuma, G. A.Voth, P. Salvador, J. J. Dannenberg, V. G. Zakrzewski, S. Dapprich,A. D. Daniels, M. C. Strain, Ö. Farkas, D. K. Malick, A. D.Rabuck, K. Raghavachari, J. B. Foresman, J. V. Ortiz, Q. Cui, A. G.Baboul, S. Clifford, J. Cioslowski, B. B. Stefanov, G. Liu, A.Liashenko, P. Piskorz, I. Komaromi, R. L. Martin, D. J. Fox, T.Keith, M. A. Al-Laham, C. Y. Peng, A. Nanayakkara, M. Challacombe,P. M. W. Gill, B. Johnson, W. Chen, M. W. Wong, C. Gonzalez, and J.A. Pople, Gaussian 03, Pittsburgh, PA:Gaussian, Inc., (2003).
